# Supplementary material for: The balance between intramolecular hydrogen bonding, polymer solubility and rigidity in single-chain polymeric nanoparticles
Source: Royal Society of Chemistry journal article supplement (doi:10.1039/c3py00094j), 2013-01-01
Supplement: c3py00094j.pdf [file c3py00094j.pdf]

## Supporting Information

for

### **Balancing intramolecular supramolecular interactions and polymer rigidity in the formation of single-chain polymeric nanoparticles**

Patrick J. M. Stals, Martijn A. J. Gillissen, Renaud Nicolaÿ, Anja R. A. Palmans,\* and E. W. Meijer\*

Laboratory of Macromolecular and Organic Chemistry and Institute of Complex Molecular Systems, Eindhoven University of Technology  
P.O. Box 513, 5600 MB, Eindhoven, The Netherlands  
fax: +31 (0) 40 245 1036 phone: +31 (0) 40 245 3105  
e-mail: a.palmans@tue.nl; e.w.meijer@tue.nl

### **Table of Contents**

|                                                                                      |   |
|--------------------------------------------------------------------------------------|---|
| DLS and SEC results of folding experiments in DMF on polymer <b>P5-P8</b> (Table S1) | 2 |
| SEC measurements on polymers <b>P5-P8</b> (Fig. S1 – Fig S7)                         | 2 |
| DLS measurements on polymers <b>P5-P8</b> (Fig. S8 – Fig S14)                        | 4 |
| <sup>1</sup> H-NMR of <b>5b</b> (Fig. S15)                                           | 6 |
| <sup>1</sup> H-NMR of polymers <b>P5-P7</b> (Fig. S16 – Fig S19)                     | 6 |
| IR measurements on <b>5a-5b</b> (Fig. S20).                                          | 7 |
| IR measurements on polymers <b>P5-P8</b> (Fig. S21 – Fig S24)                        | 8 |

**Table S1:** DLS and SEC results of folding experiments in DMF on polymer **P5-P8**.

| Polymer    | $M_{n,p}$<br>(Da.) | PDI <sub>p</sub> | $M_{n,d}$<br>(Da.) | PDI <sub>d</sub> | Collapse<br>(%) | $R_{H,p}$<br>(nm) | $R_{H,d}$<br>(nm) |
|------------|--------------------|------------------|--------------------|------------------|-----------------|-------------------|-------------------|
| <b>P5a</b> | 13500              | 1.13             | 13200              | 1.10             | 2.3             | 17.6              | 16.2              |
| <b>P5b</b> | 41000              | 1.66             | 32700              | 1.42             | 20.1            | 9.1               | 8.5               |
| <b>P5c</b> | 16200              | 1.23             | 7000               | 1.42             | 56.8            | 4.5               | 4.9               |
| <b>P6</b>  | nd <sup>a</sup>    | nd <sup>a</sup>  | nd <sup>a</sup>    | nd <sup>a</sup>  | nd <sup>a</sup> | nd <sup>a</sup>   | nd <sup>a</sup>   |
| <b>P7a</b> | 8900               | 1.28             | 6000               | 1.36             | 31.9            | 4.6               | 4.4               |
| <b>P7b</b> | nd                 | nd               | nd                 | nd               | nd              | 5.3               | 5.0               |
| <b>P8</b>  | nd <sup>a</sup>    | nd <sup>a</sup>  | nd <sup>a</sup>    | nd <sup>a</sup>  | nd <sup>a</sup> | nd <sup>a</sup>   | nd <sup>a</sup>   |

nd = not determined.  $M_{n,p}$  =  $M_n$  photoprotected polymer in Da.  $M_{n,d}$  =  $M_n$  deprotected polymer in Da.  $M_n$  relative to PEO standards. a: no signal detected; because of insufficient RI difference between solvent and polymer.

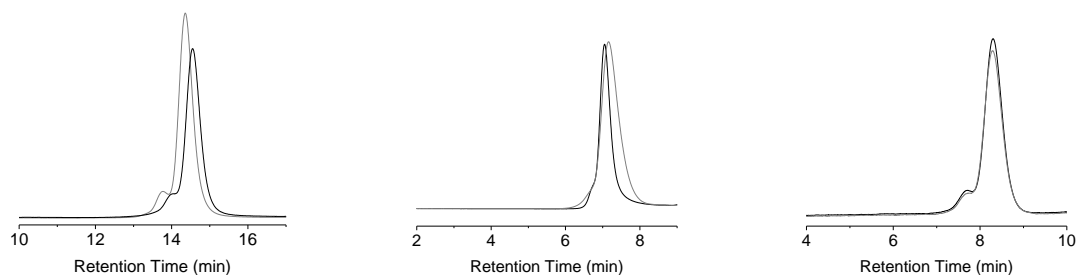

**Fig. S1:** SEC traces of polymer **P5a** in THF (left), chloroform (middle) and DMF (right) before (grey) and after deprotection (black) of the photocleavable group.

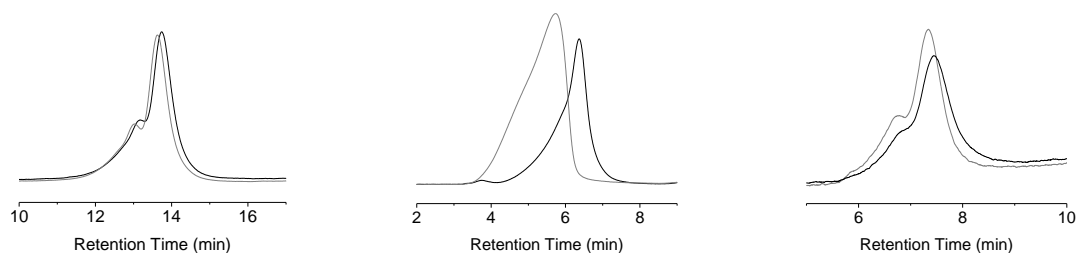

**Fig. S2:** SEC traces of polymer **P5b** in THF (left), chloroform (middle) and DMF (right) before (grey) and after deprotection (black) of the photocleavable group.

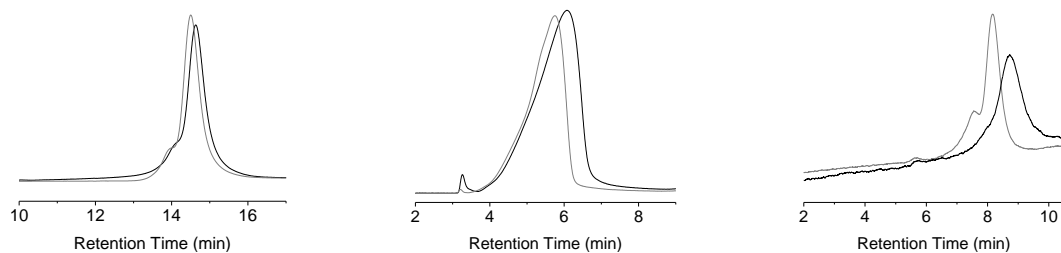

**Fig. S3:** SEC traces of polymer **P5c** in THF (left), chloroform (middle) and DMF (right) before (grey) and after deprotection (black) of the photocleavable group.

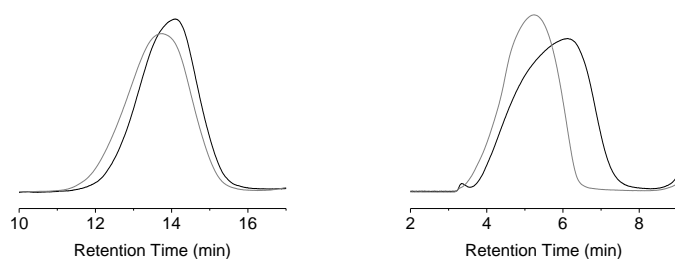

**Fig. S4:** SEC traces of polymer **P6** in THF (left and, chloroform (right) before (grey) and after deprotection (black) of the photocleavable group.

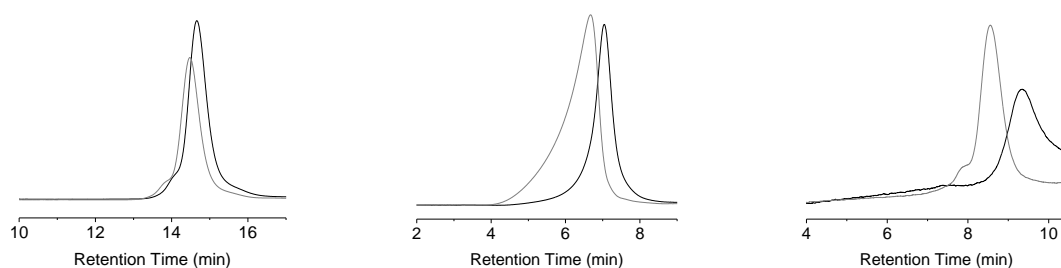

**Fig. S5:** SEC traces of polymer **P7a** in THF (left), chloroform (middle) and DMF (right) before (grey) and after deprotection (black) of the photocleavable group.

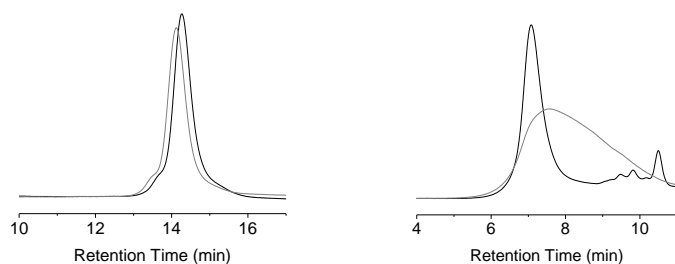

**Fig. S6:** SEC traces of polymer **P7b** in THF (left and, chloroform (right) before (grey) and after deprotection (black) of the photocleavable group.

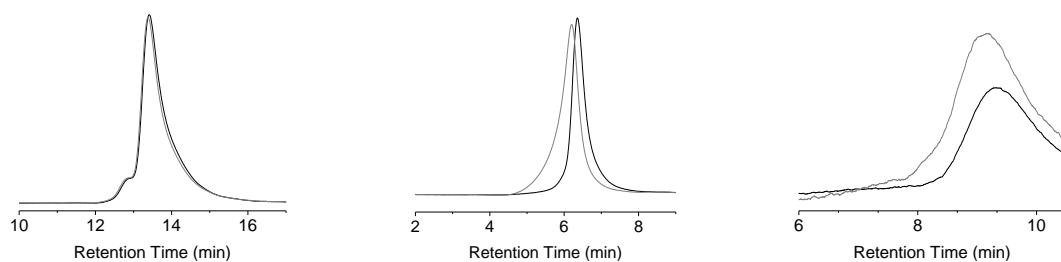

**Fig. S7:** SEC traces of polymer **P8** in THF (left), chloroform (middle) and DMF (right) before (grey) and after deprotection (black) of the photocleavable group.

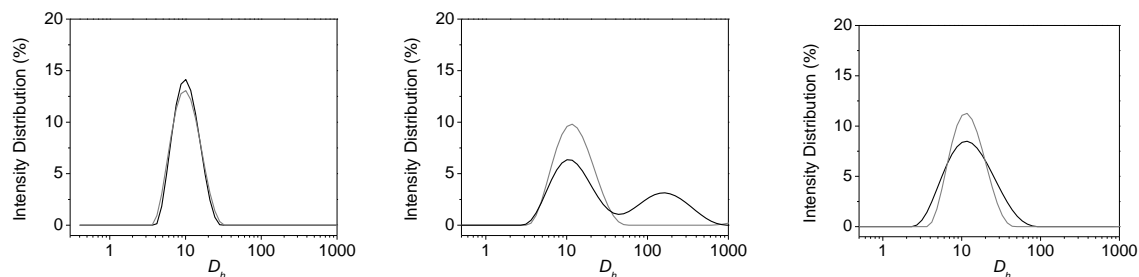

**Fig. S8:** DLS measurements on polymer **P5a** in THF (left), chloroform (middle) and DMF (right) before (grey) and after deprotection (black) of the photocleavable group.

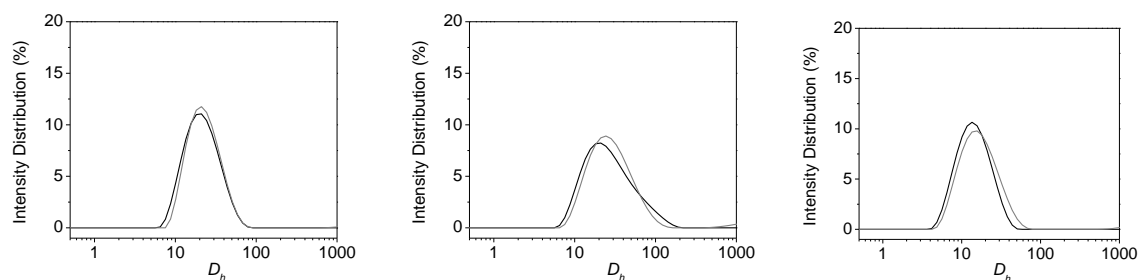

**Fig. S9:** DLS measurements on polymer **P5b** in THF (left), chloroform (middle) and DMF (right) before (grey) and after deprotection (black) of the photocleavable group.

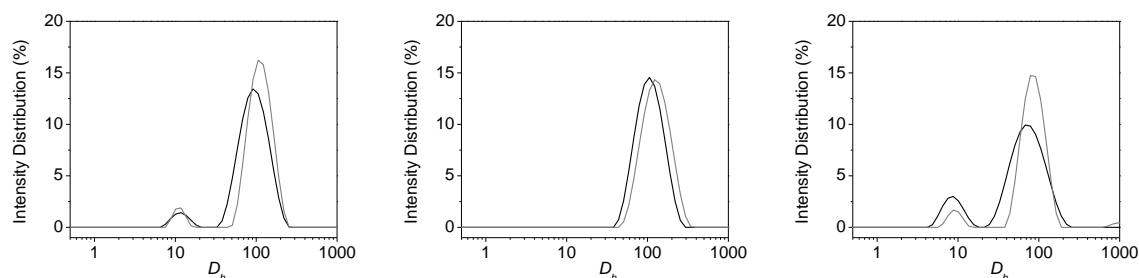

**Fig. S10:** DLS measurements on polymer **P5c** in THF (left), chloroform (middle) and DMF (right) before (grey) and after deprotection (black) of the photocleavable group.

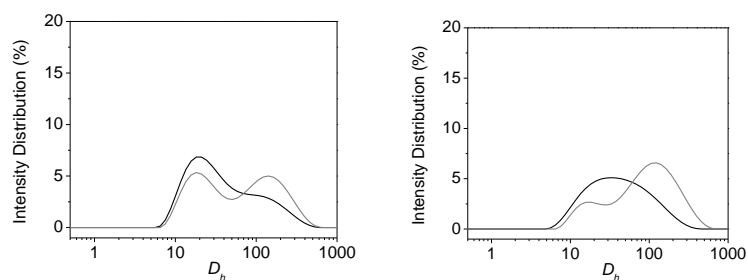

**Fig. S11:** DLS measurements on polymer **P6** in THF (left) and chloroform (right) before (grey) and after deprotection (black) of the photocleavable group.

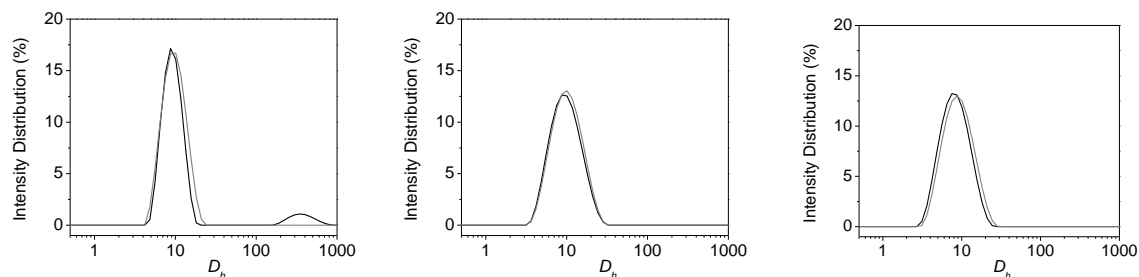

**Fig. S12:** DLS measurements on polymer **P7a** in THF (left) and chloroform (right) before (grey) and after deprotection (black) of the photocleavable group.

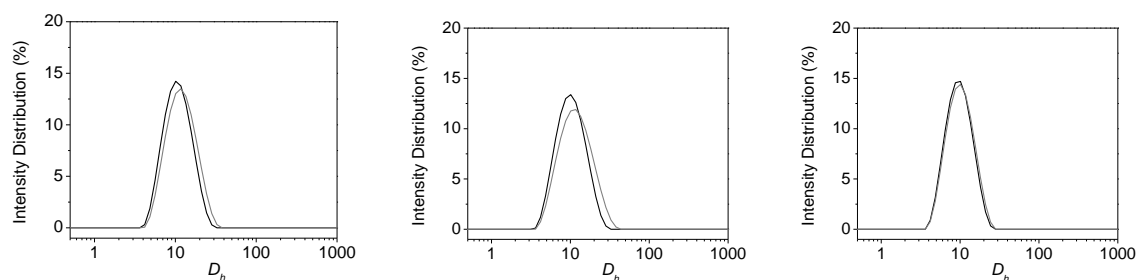

**Fig. S13:** DLS measurements on polymer **P7b** in THF (left), chloroform (middle) and DMF (right) before (grey) and after deprotection (black) of the photocleavable group.

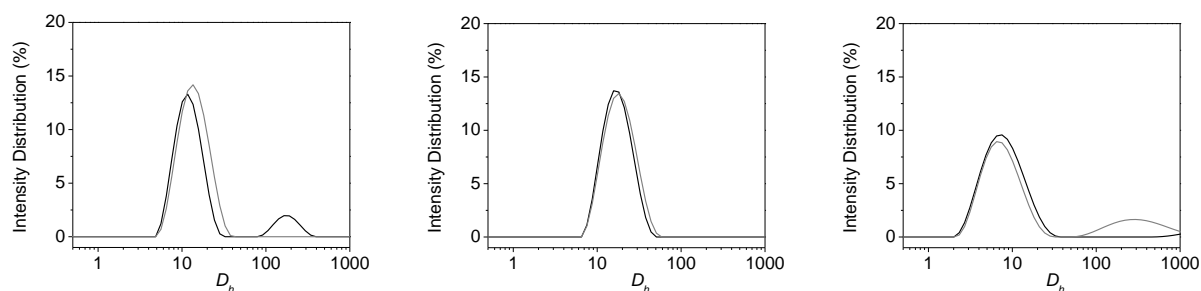

**Fig. S14:** DLS measurements on polymer **P8** in THF (left), chloroform (middle) and DMF (right) before (grey) and after deprotection (black) of the photocleavable group.

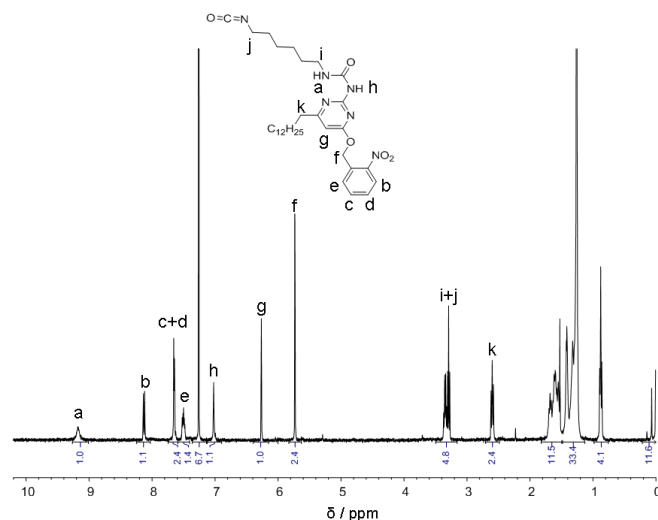

**Fig. S15:**  $^1\text{H}$ -NMR spectrum of **5b**.

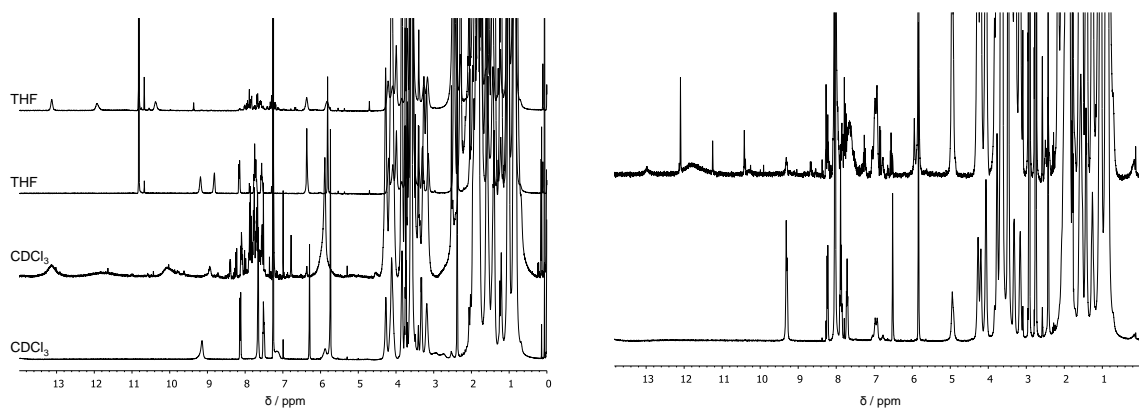

**Fig. S16:**  $^1\text{H}$ -NMR spectra of **P5a** in  $\text{CDCl}_3$  before (bottom-left) and after (second from bottom-left) deprotection, in THF- $d_8$  before (third from bottom-left) and after (top-left) deprotection and in DMF- $d_7$  before (bottom right) and after deprotection (top right) of the photocleavable group.

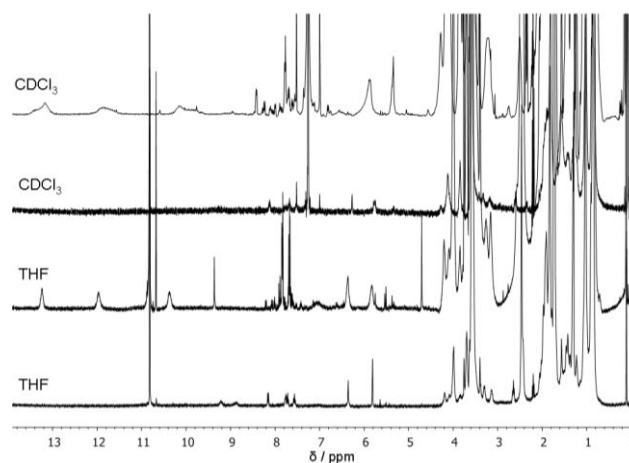

**Fig. S17:**  $^1\text{H}$ -NMR spectra of **P5b** in  $\text{CDCl}_3$  before (second from top) and after (top) deprotection, in THF- $d_8$  before (bottom) and after (second from bottom) deprotection of the photocleavable group.

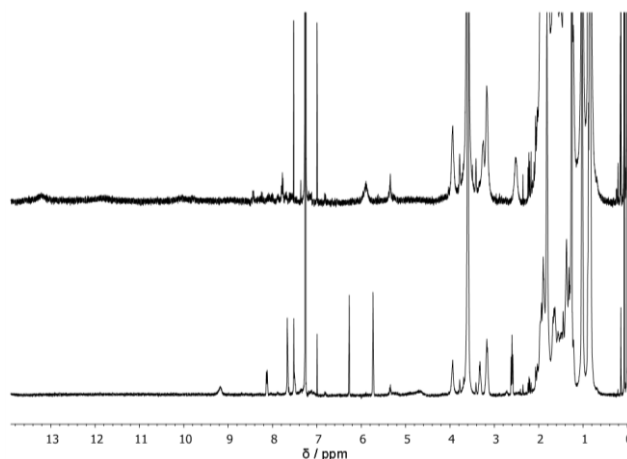

**Fig. S18:**  $^1\text{H}$ -NMR spectra of **P5c** in  $\text{CDCl}_3$  after (top) and before (bottom) deprotection of the photocleavable group.

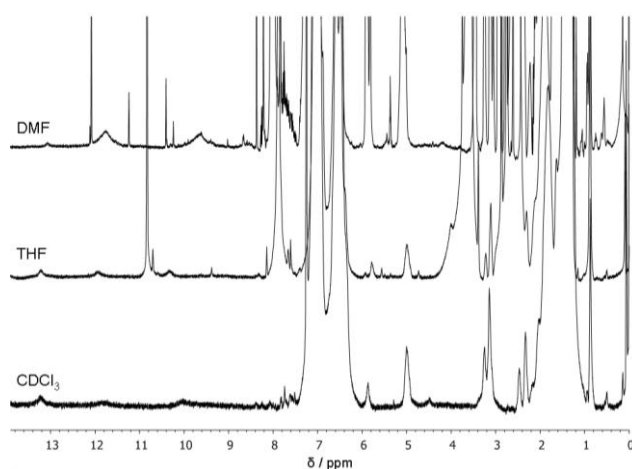

**Fig. S19:**  $^1\text{H}$ -NMR spectra of **P7b** in  $\text{CDCl}_3$  (bottom), in  $\text{THF-d}_8$  (middle) and  $\text{DMF-d}_7$  (top) after deprotection of the photocleavable group.

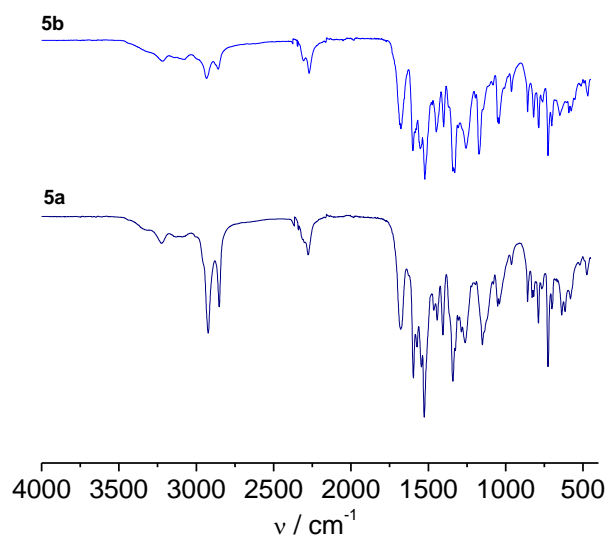

**Fig. S20:** IR-spectra of compound **5b** (top) and **5a** (bottom).

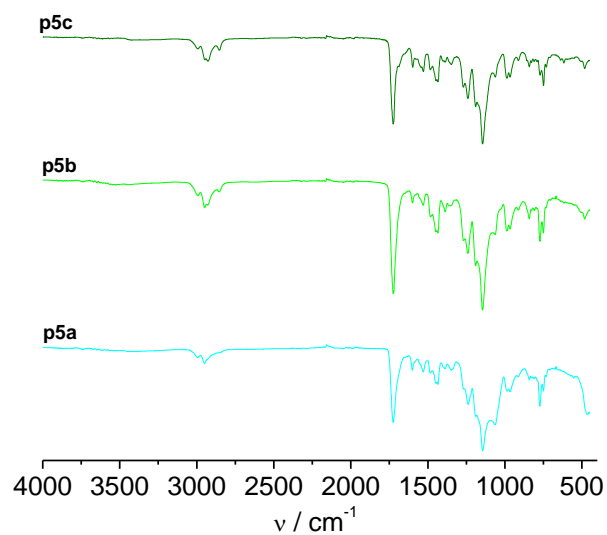

**Fig. S21:** IR-spectra of **P5c** (top), **P5b** (middle) and **P5a** (bottom).

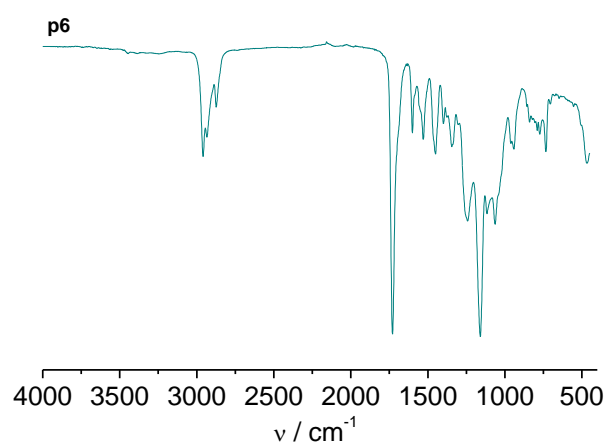

**Fig. S22:** IR-spectrum of **P6**.

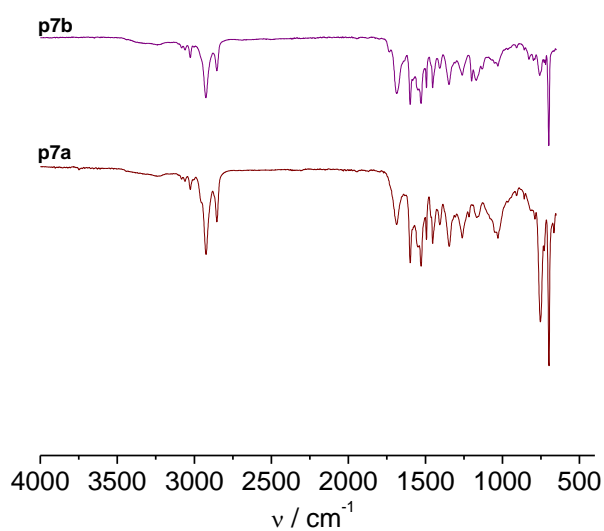

**Fig. S23:** IR-spectra of **P7b** (top) and **P7a** (bottom).



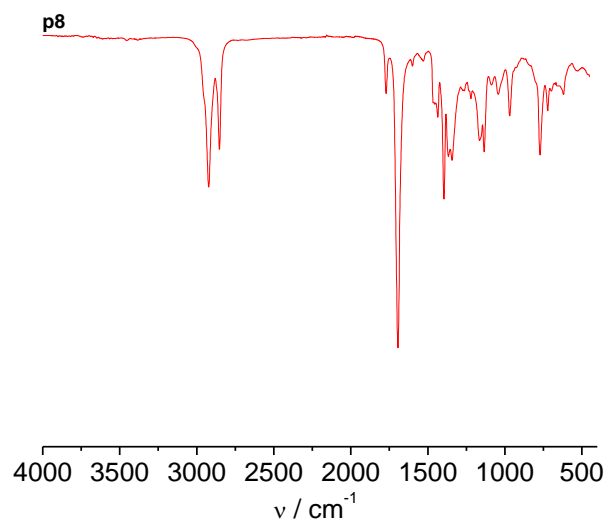

**Fig. S24:** IR-spectrum of **P8**.
